# Supplementary material for: Novel hetero-bimetallic coordination polymer as a single source of highly dispersed Cu/Ni nanoparticles for efficient photocatalytic water splitting
Source: Royal Society of Chemistry journal article supplement (doi:10.1039/c8qi00355f), 2018-01-01
Supplement: c8qi00355f1.pdf [file c8qi00355f1.pdf]

## **Novel hetero-bimetallic coordination polymer as a single source of highly dispersed Cu/Ni nanoparticles for efficient photocatalytic water splitting**

Shaista Ibrahim,<sup>1,2</sup> Imran Majeed,<sup>1</sup> Yuhong Qian,<sup>2</sup> Azhar Iqbal,<sup>1</sup> Dan Zhao,<sup>2\*</sup> David R. Turner<sup>3\*</sup> and Muhammad Arif Nadeem<sup>1\*</sup>

<sup>1</sup>Catalysis and Nanomaterials Lab 27, Department of Chemistry, Quaid-i-Azam University, Islamabad 45320, Pakistan

<sup>2</sup>Department of Chemical & Biomolecular Engineering, National University of Singapore, 4 Engineering Drive 4, 117585 Singapore

<sup>3</sup>School of Chemistry, Monash University, Clayton, Victoria 3800, Australia

\*Contact details:

M.A.N; manadeem@qau.edu.pk, +92-51-9064-2062

D.Z; chezhao@nus.edu.sg, +65-6516 4679

D.R.T; david.turner@monash.edu, +61 3 9905 6293

### **Characterization**

Single Crystal X-ray diffraction data were collected using the MX1 beamline at the Australian Synchrotron operating at 17.4 keV ( $\lambda = 0.7107 \text{ \AA}$ )<sup>1</sup>. The data collection temperature was maintained at 100 K using an open-flow N<sub>2</sub> cryostream. Data collection was conducted using the program Blu-Ice.<sup>1</sup> Initial data reduction was carried out using the XDS package.<sup>2</sup> The structure was solved by direct methods using SHELXS-2013.<sup>3</sup> Least-squares refinement against F<sup>2</sup> was conducted using SHELXL-2013 using the program X-Seed as a graphical interface.<sup>4</sup> All non-H atoms were refined using an anisotropic model. H atoms were placed in idealized positions and refined using riding models. H atoms of the lattice water molecules

were located from the Fourier difference map and refined using distance restraints. Powder XRD patterns were collected on Bruker D8 Advance X-ray powder diffractometer equipped with a Cu sealed tube ( $\lambda = 1.54178 \text{ \AA}$ ) at a scan rate of  $2^\circ \text{ min}^{-1}$ . The Fourier transform infrared (FTIR) spectra were studied with Bio-Rad FTS-3500 ARX FTIR spectrometer. Thermogravimetric studies (TGA) were carried out using a Shimadzu DTG-60AH in the temperature range of 25 to 800  $^\circ\text{C}$  under flowing air ( $30 \text{ mL min}^{-1}$ ) and a heating rate of  $10^\circ\text{C min}^{-1}$ . UV-vis absorbance spectra of the photocatalysts were collected over the wavelength range of 200–800 nm using a Thermo Fisher Scientific UV-vis spectrophotometer equipped with a praying mantis diffuse reflectance accessory. Field-emission transmission electron microscopy (FE-TEM) was conducted on a JEOL-JEM 2100F transmission electron microscope (200 kV). X-ray photoelectron spectroscopy (XPS) experiments were done with a Kratos AXIS Ultra DLD surface analysis instrument using a monochromatic Al  $K\alpha$  radiation (1486.71 eV) at 15 kV as the excitation source. The take-off angle of the emitted photoelectrons was  $90^\circ$  (the angle between the plane of sample surface and the entrance lens of the detector). Peak position was calibrated by referencing the C 1s peak position of adventitious carbon for a sample (284.8 eV), and shifting all other peaks in the spectrum accordingly. Fitting was done using the program Casa XPS. Photoluminescence (PL) studies were done by using a Flau Time 300 (FT-300) steady-state and lifetime spectrometer, PicoQuant GmbH, Germany. The PL was measured by using a pulsed LED laser excitation source, PLS-300, centered at 305 nm with full-width half-maximum (FWHM) of  $\sim 416 \text{ ps}$  and pulse energy 0.077 pJ. The PL curves were fitted by using Easy Tau and FluoFit software.

### **Hydrogen production experiments**

5 mg of photocatalyst was dispersed in the Pyrex reactor (140 mL) containing 25 mL of glycerol/water mixture (20 vol. % glycerol) as sacrificial reagent. The suspension was purged with  $\text{N}_2$  for 40 min in order to force out the dissolved and headspace oxygen otherwise oxygen can scavenge electrons from the C.B of  $\text{TiO}_2$  and generate superoxide radicals which

react with sacrificial electron donor.<sup>5</sup> UV light excitation source [Spectroline model SB-100P/F lamp (100 W, 365 nm)] was placed at a distance of 10 cm from the reactor. The photon flux measured at the sample was  $\sim 6.5 \text{ mW cm}^{-2}$  (comparable to UV flux in sunlight).  $\text{H}_2$  evolution was checked by removing the gas head space samples (0.5 mL) at regular time intervals and injecting them into the GC (Shimadzu GC 2014) equipped with a TCD detector and molecular sieve capillary column (Length = 25 mm; ID = 0.32 mm; average thickness 0.50  $\mu\text{m}$ ). Volume of  $\text{H}_2$  evolved during photoreaction was calculated against an internal calibration curve. The photocatalytic tests for each sample were repeated at least three times for accuracy.  $\text{TiO}_2$ , with band gap of 3.15 eV, can only be excited by radiation below ca. 400 nm. The external quantum efficiency (EQE) was found to be 15.78% under similar photocatalytic reaction conditions using the following equation.<sup>6</sup>

$$\text{EQE} = \frac{n\text{H}_2 \times N_A \times h \times c \times 2}{t_{\text{irr}} \times \lambda \times I \times A} \times 100$$

Where

$n\text{H}_2$  = Number of moles of hydrogen produced

$N_A$  = Avogadro's number

$h$  = Plank's constant

$c$  = speed of light

$t_{\text{irr}}$  = Irradiation time

$\lambda$  = Wavelength of incident light

$I$  = Intensity of lamp

$A$  = Illuminated area of photoreactor

**Turnover Number (TON)**

Activity of bulk =  $[\text{mol}(\text{H}_2) / \text{g}(\text{bulk catalyst})]$

Activity relative to proportion of metal =  $[\text{mol}(\text{H}_2) / (\text{g}(\text{bulk catalyst}) \times \text{wt.}\%(\text{metal}))]$

$$\text{TON relative to active metal} = [\text{mol}(\text{H}_2)] / [(\text{g}(\text{bulk catalyst}) \times \text{wt.}\%(\text{metal})) / \text{Mr}(\text{metal})]$$

e.g. In the case of 1.0% Cu-Ni/TiO<sub>2</sub> composites, where a 1.0 wt. % Cu/Ni loading was done on TiO<sub>2</sub>, the metrics for dihydrogen evolution are as following equation after 8 h.<sup>7</sup>

$$\text{Activity of bulk} = 73.88239 \times 10^{-3} \text{ mol}(\text{H}_2) \text{ g}(\text{bulk})^{-1}$$

$$\begin{aligned} \text{Activity relative to proportion of metal} &= 73.88239 \times 10^{-3} \text{ mol}(\text{H}_2) \text{ g}(\text{bulk})^{-1} / (1.0/100) \text{ wt. \%} \\ &= 7.388239 \text{ mol}(\text{H}_2) \text{ g}(\text{metal})^{-1} \end{aligned}$$

$$\begin{aligned} \text{TON} &= 7.388239 \text{ mol}(\text{H}_2) \text{ g}(\text{metal})^{-1} \times (63.546 + 58.69 \text{ g mol}^{-1}) \\ &= 903.11 \end{aligned}$$

### **Turn of frequency (TOF)**

$$\text{TOF relative to active metal} = \text{TON h}^{-1}$$

$$\text{TOF} = 903.11 / 8 \text{ h}$$

$$= 112.89 \text{ h}^{-1}$$

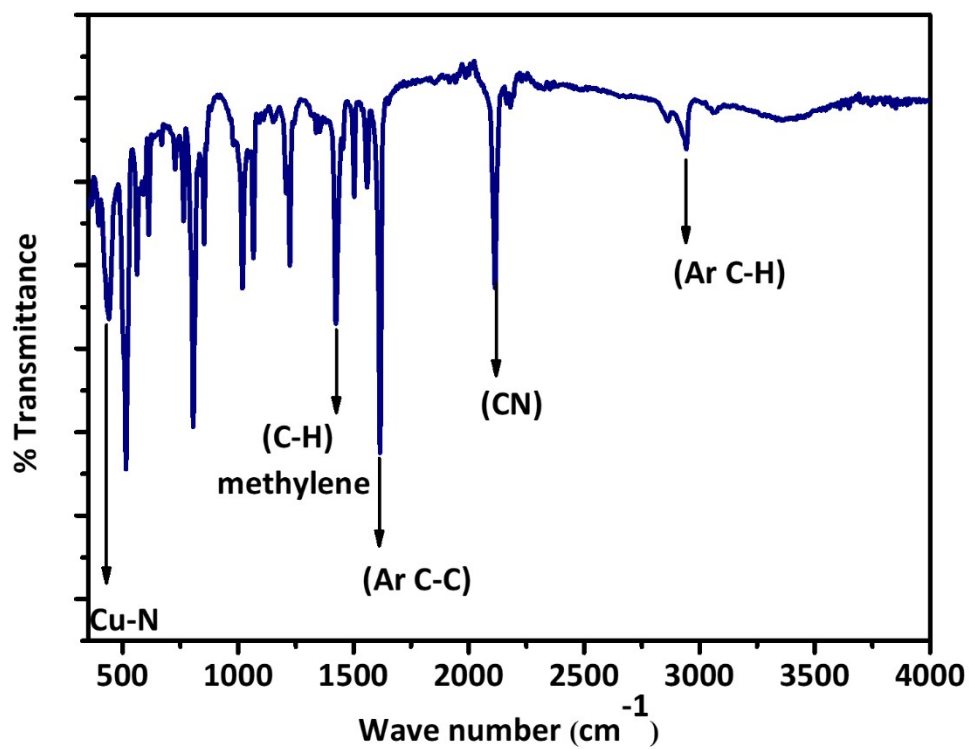

**Figure S1.** FTIR spectrum of CP-1

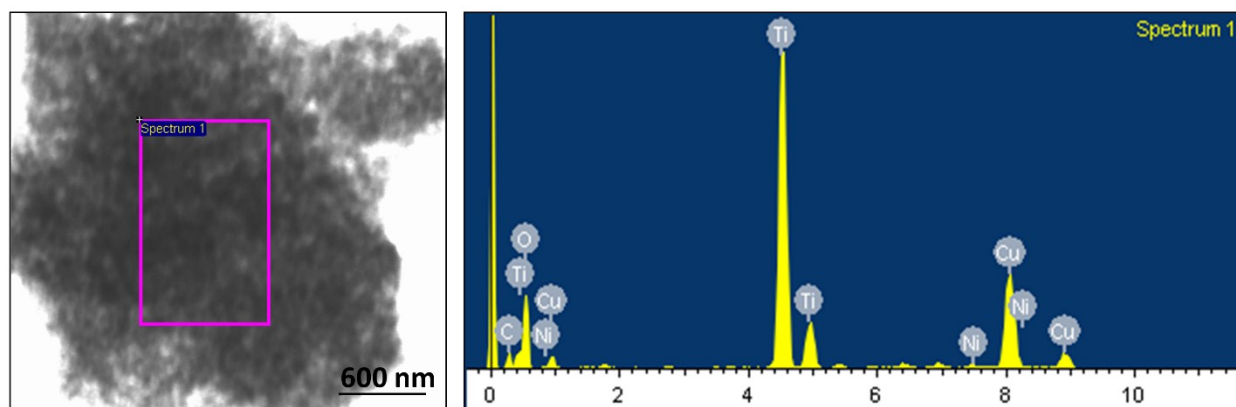

**Figure S2.** TEM EDX studies on 1%Cu-Ni/TiO<sub>2</sub>-470 composite: (a) TEM image at 600nm; (b) spectrum indicates the presence of Ti, O, Ni and Cu.

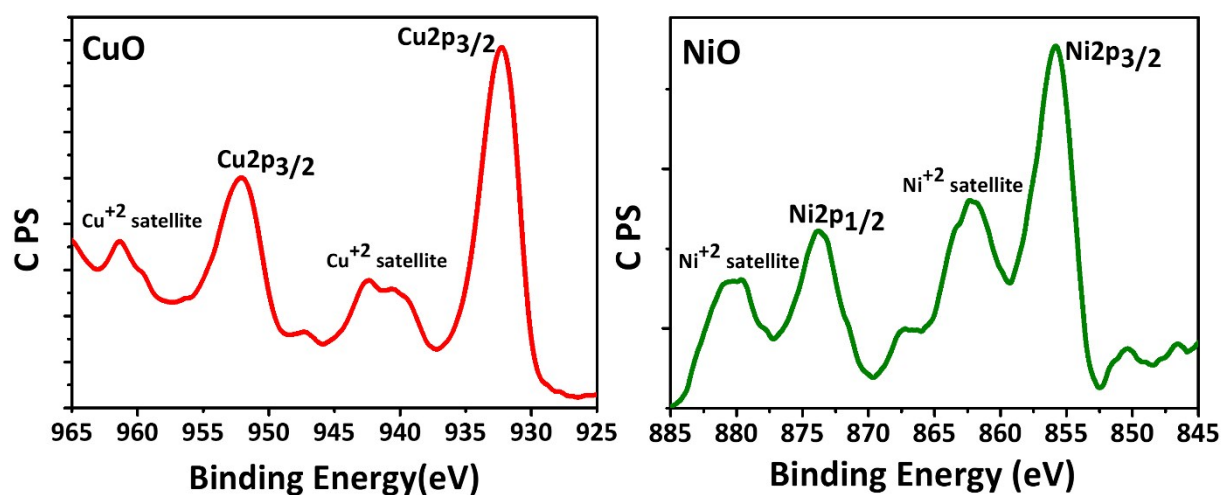

**Figure S3.** XPS spectra of Cu2p and Ni 2p for 1% CuO-NiO/TiO<sub>2</sub>-470 photocatalyst

**Table S1:** Selected bond lengths and bond angles of **CP-1**

| <b>Bond lengths (Å)</b> |          |             |           |
|-------------------------|----------|-------------|-----------|
| Cu1–N1                  | 2.111(3) | Cu2–N9      | 2.005(3)  |
| Cu1–N3                  | 2.252(3) | Ni1–C27     | 1.844(3)  |
| Cu1–N5                  | 2.011(2) | Ni1–C28     | 1.869(3)  |
| Cu2–N2                  | 2.250(3) | Ni2–C29     | 1.837(4)  |
| Cu2–N4                  | 2.095(2) | Ni2–C30     | 1.868(3)  |
| Cu2–N7                  | 2.007(4) | Ni2–C31     | 1.833(4)  |
| <b>Bond angles (°)</b>  |          |             |           |
| N1–Cu1–N1               | 180.00   | N4–Cu2–N4   | 178.10(9) |
| N1–Cu1–N3               | 87.37(9) | N2–Cu2–N9   | 90.9(1)   |
| N1–Cu1–N3               | 92.63(9) | N4–Cu2–N7   | 90.9(1)   |
| N1–Cu1–N5               | 90.44(9) | N4–Cu2–N9   | 89.1(1)   |
| N1–Cu1–N5               | 89.56(9) | N9–Cu2–N7   | 180.0(1)  |
| N3–Cu1–N3               | 180.00   | C28–Ni1–C28 | 180.00    |
| N3–Cu1–N5               | 90.95(9) | C28–Ni1–C27 | 89.8(1)   |
| N3–Cu1–N5               | 89.05(9) | C28–Ni1–C27 | 90.2(1)   |
| N5–Cu1–N5               | 180.00   | C27–Ni1–C27 | 180.00    |
| N2–Cu2–N2               | 178.2(1) | C30–Ni2–C30 | 179.4(1)  |
| N2–Cu2–N4               | 87.8(1)  | C30–Ni2–C29 | 89.7(2)   |
| N2–Cu2–N4               | 92.2(1)  | C30–Ni2–C31 | 90.3(2)   |
| N2–Cu2–N7               | 89.1(1)  | C29–Ni2–C31 | 180.00    |

## References

1. N. P. Cowieson, D. Aragao, M. Clift, D. J. Ericsson, C. Gee, S. J. Harrop, N. Mudie, S. Panjikar, J. R. Price and A. Riboldi-Tunncliffe, *Journal of synchrotron radiation*, 2015, **22**, 187-190.
2. W. Kabsch, *Acta Crystallographica Section D: Biological Crystallography*, 2010, **66**, 125-132.
3. G. M. Sheldrick, *Acta Crystallographica Section A: Foundations of Crystallography*, 2008, **64**, 112-122.
4. L. J. Barbour, *Journal*, 2001.
5. A. Nadeem, J. Muir, K. Connelly, B. Adamson, B. Metson and H. Idriss, *Physical Chemistry Chemical Physics*, 2011, **13**, 7637-7643.

6. T. Sakai, D. Mersch and E. Reisner, *Angewandte Chemie International Edition*, 2013, **52**, 12313-12316.
7. K. Meyer, S. Bashir, J. Llorca, H. Idriss, M. Ranocchiari and J. A. van Bokhoven, *Chemistry-A European Journal*, 2016, **22**, 13894-13899.
